# Supplementary material
Source: PubMed Central journal article supplement (PMC3564650)
Supplement: NIHMS397065-supplement.pdf [file NIHMS397065-supplement.pdf]

# SUPPORTING INFORMATION

## CPMV-DOX Delivers

*Alaa A.A. Aljabali<sup>1,†,#</sup> Sourabh Shukla,<sup>2,#</sup> George P. Lomonosoff,<sup>1</sup>  
Nicole F. Steinmetz<sup>2,3,4,\*</sup> and David J. Evans<sup>1,\*</sup>*

<sup>1</sup>Department of Biological Chemistry, John Innes Centre, Norwich Research Park, Norwich, NR4 7UH, UK. Department of <sup>2</sup>Biomedical Engineering, <sup>3</sup>Radiology, <sup>4</sup>Materials Science and Engineering, Case Western Reserve University, 10900 Euclid Ave., Cleveland, OH 44106, USA.

† **Present address:** Department of Cardiovascular Medicine, University of Oxford, Level 6 West Wing, John Radcliffe Hospital, Headley Way, Headington, Oxford, OX3 9DU, UK.

# Each of these authors contributed equally to the work.

\* **Corresponding authors:** Prof. Nicole F. Steinmetz, Department of Biomedical Engineering, Radiology, Materials Science and Engineering, Case Western Reserve University School of Medicine, 10900 Euclid Avenue, Cleveland, OH 44106, USA, telephone: + 216-368-5590, email: [nicole.steinmetz@case.edu](mailto:nicole.steinmetz@case.edu) and Prof. David J. Evans, Department of Biological Chemistry, John Innes Centre, Norwich Research Park, Norwich, NR4 7UH, UK, telephone: + 1603 450706, email: [dave.evans@jic.ac.uk](mailto:dave.evans@jic.ac.uk).

## UV-Visible Spectra

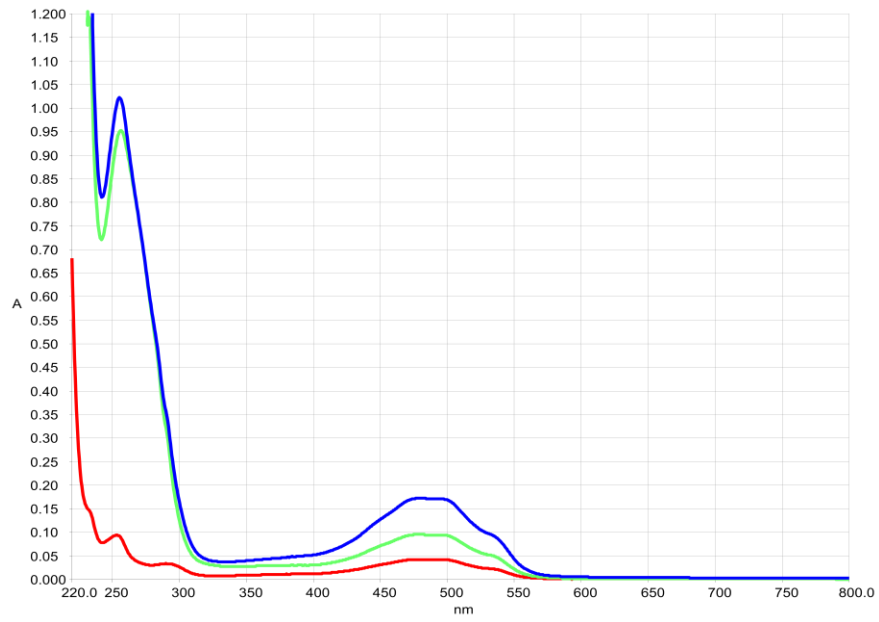

UV-visible solution spectrum of free DOX (red-line), CPMV-DOX (green-line) and CPMV-SS-DOX (blue-line).

## Zeta Potential Measurements

**A**

|                            | Mean (mV)     | Area (%) | Width (mV) |
|----------------------------|---------------|----------|------------|
| Zeta Potential (mV): -12.3 | Peak 1: -12.3 | 100.0    | 7.09       |
| Zeta Deviation (mV): 7.09  | Peak 2: 0.00  | 0.0      | 0.00       |
| Conductivity (mS/cm): 1.31 | Peak 3: 0.00  | 0.0      | 0.00       |
| Result                     | Good          |          |            |

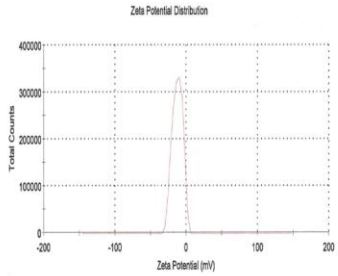

**B**

|                            | Mean (mV)     | Area (%) | Width (mV) |
|----------------------------|---------------|----------|------------|
| Zeta Potential (mV): -14.6 | Peak 1: -19.9 | 62.6     | 5.14       |
| Zeta Deviation (mV): 8.92  | Peak 2: -5.54 | 37.4     | 4.71       |
| Conductivity (mS/cm): 1.47 | Peak 3: 0.00  | 0.0      | 0.00       |
| Result                     | Good          |          |            |

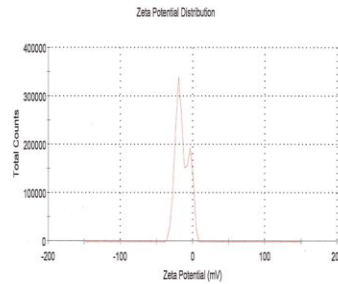

**C**

|                            | Mean (mV)     | Area (%) | Width (mV) |
|----------------------------|---------------|----------|------------|
| Zeta Potential (mV): -25.2 | Peak 1: -23.9 | 91.3     | 5.27       |
| Zeta Deviation (mV): 7.00  | Peak 2: -41.3 | 8.7      | 2.91       |
| Conductivity (mS/cm): 1.37 | Peak 3: 0.00  | 0.0      | 0.00       |
| Result                     | Good          |          |            |

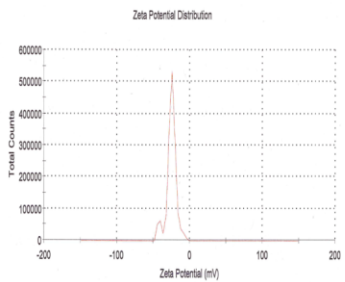

**D**

|                            | Mean (mV)     | Area (%) | Width (mV) |
|----------------------------|---------------|----------|------------|
| Zeta Potential (mV): -38.1 | Peak 1: -38.1 | 100.0    | 3.86       |
| Zeta Deviation (mV): 3.86  | Peak 2: 0.00  | 0.0      | 0.00       |
| Conductivity (mS/cm): 1.50 | Peak 3: 0.00  | 0.0      | 0.00       |
| Result                     | Good          |          |            |

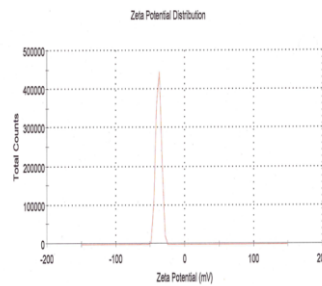

**E**

|                            | Mean (mV)     | Area (%) | Width (mV) |
|----------------------------|---------------|----------|------------|
| Zeta Potential (mV): -36.7 | Peak 1: -36.7 | 100.0    | 4.27       |
| Zeta Deviation (mV): 4.27  | Peak 2: 0.00  | 0.0      | 0.00       |
| Conductivity (mS/cm): 1.49 | Peak 3: 0.00  | 0.0      | 0.00       |
| Result                     | Good          |          |            |

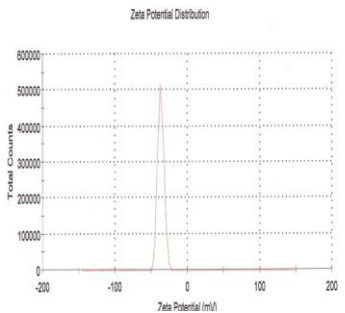

Zeta potential measurements for (A) CPMV, (B) CPMV-NHS-ester, (C) CPMV-DTUSSP, (D) CPMV-DOX, (E) CPMV-SS-DOX.
